# Supplementary material
Source: PubMed Central journal article supplement (PMC7954662)
Supplement: NIHMS1671017-supplement-Hilger_Supplementary.pdf [file NIHMS1671017-supplement-Hilger_Supplementary.pdf]

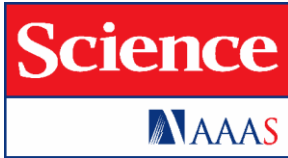

Supplementary Material for  
**Structural insights into differences in G protein activation by family A  
and family B GPCRs**

Daniel Hilger, Kaavya Krishna Kumar, Hongli Hu, Mie Fabricius Pedersen,  
Evan S. O'Brien, Lise Giehm, Christine Jennings, Gözde Eskici, Asuka Inoue,  
Michael Lerch, Jesper Mosolff Mathiesen\*, Georgios Skiniotis\*, Brian K. Kobilka\*

\*Corresponding author. Email: [jmm@zealandpharma.com](mailto:jmm@zealandpharma.com) (J.M.M.); [yiorgo@stanford.edu](mailto:yiorgo@stanford.edu) (G.S.);  
[kobilka@stanford.edu](mailto:kobilka@stanford.edu) (B.K.K)

Published 31 July 2020, *Science* **369**, eaba3373 (2020)  
DOI: 10.1126/science.aba3373

**This PDF file includes:**

Figs. S1to S9  
Tables S1to S9  
References

## Supplementary Materials

Fig. S1 – S9

Table S1 – S9

References 51 - 73

## Supplemental Figures

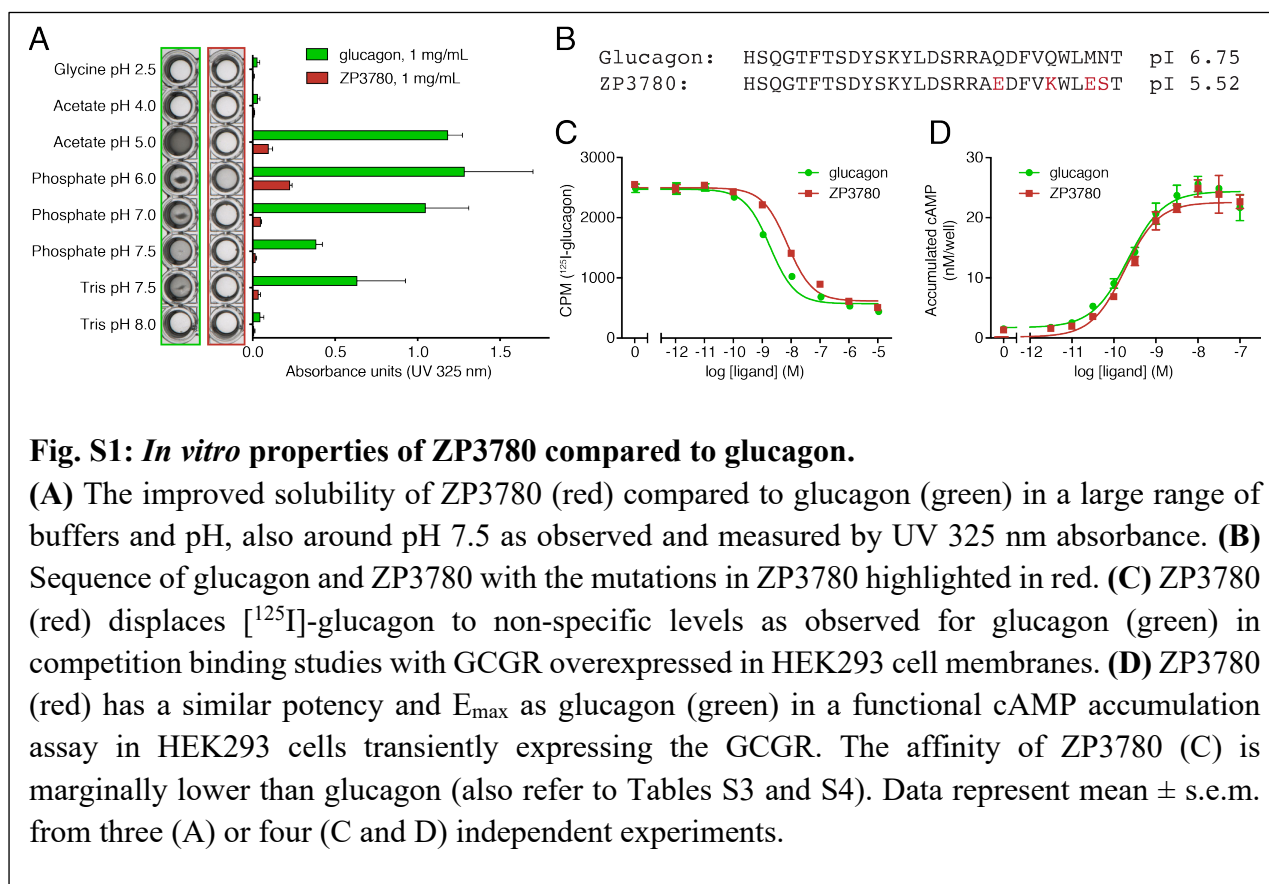

**Fig. S1: *In vitro* properties of ZP3780 compared to glucagon.**

(A) The improved solubility of ZP3780 (red) compared to glucagon (green) in a large range of buffers and pH, also around pH 7.5 as observed and measured by UV 325 nm absorbance. (B) Sequence of glucagon and ZP3780 with the mutations in ZP3780 highlighted in red. (C) ZP3780 (red) displaces [<sup>125</sup>I]-glucagon to non-specific levels as observed for glucagon (green) in competition binding studies with GCGR overexpressed in HEK293 cell membranes. (D) ZP3780 (red) has a similar potency and  $E_{max}$  as glucagon (green) in a functional cAMP accumulation assay in HEK293 cells transiently expressing the GCGR. The affinity of ZP3780 (C) is marginally lower than glucagon (also refer to Tables S3 and S4). Data represent mean  $\pm$  s.e.m. from three (A) or four (C and D) independent experiments.

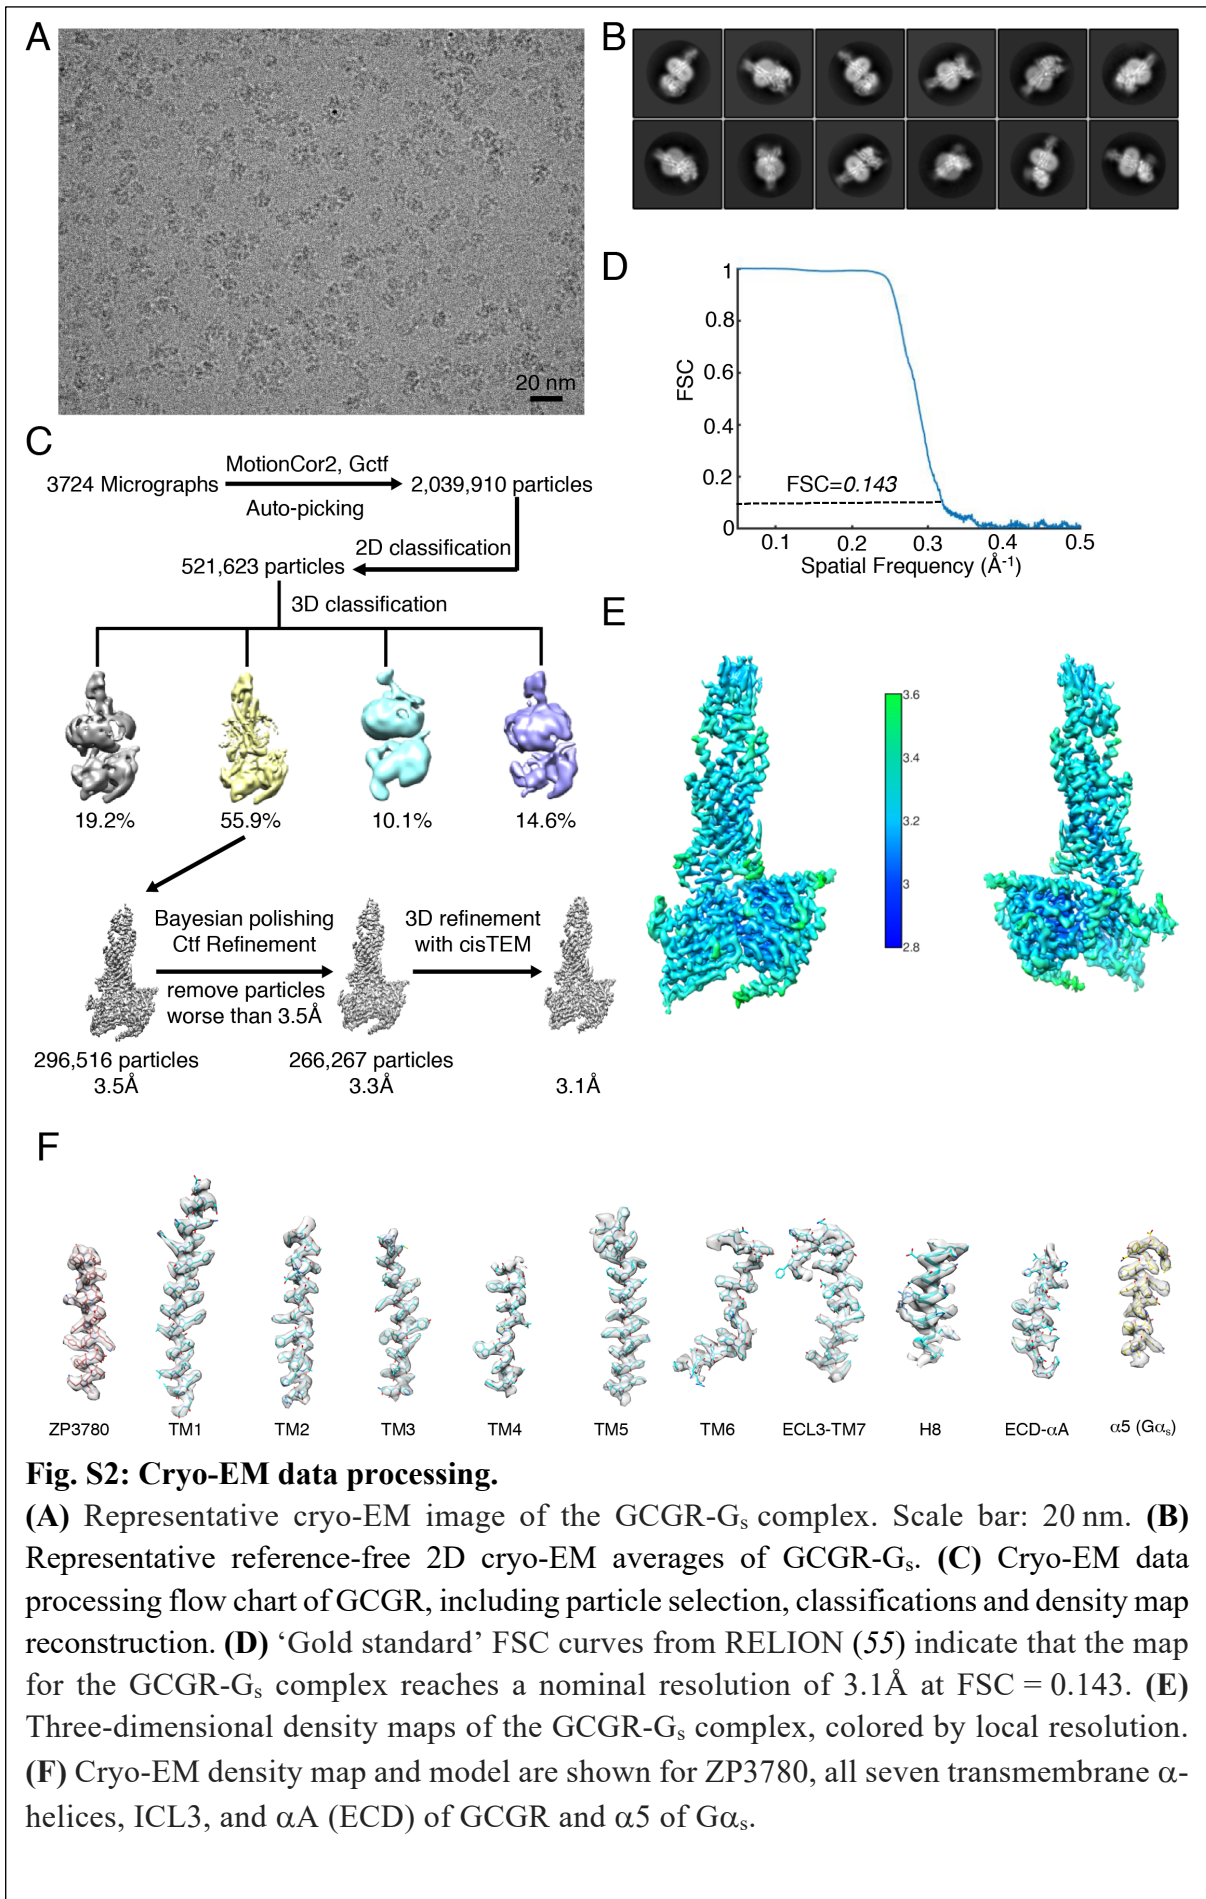

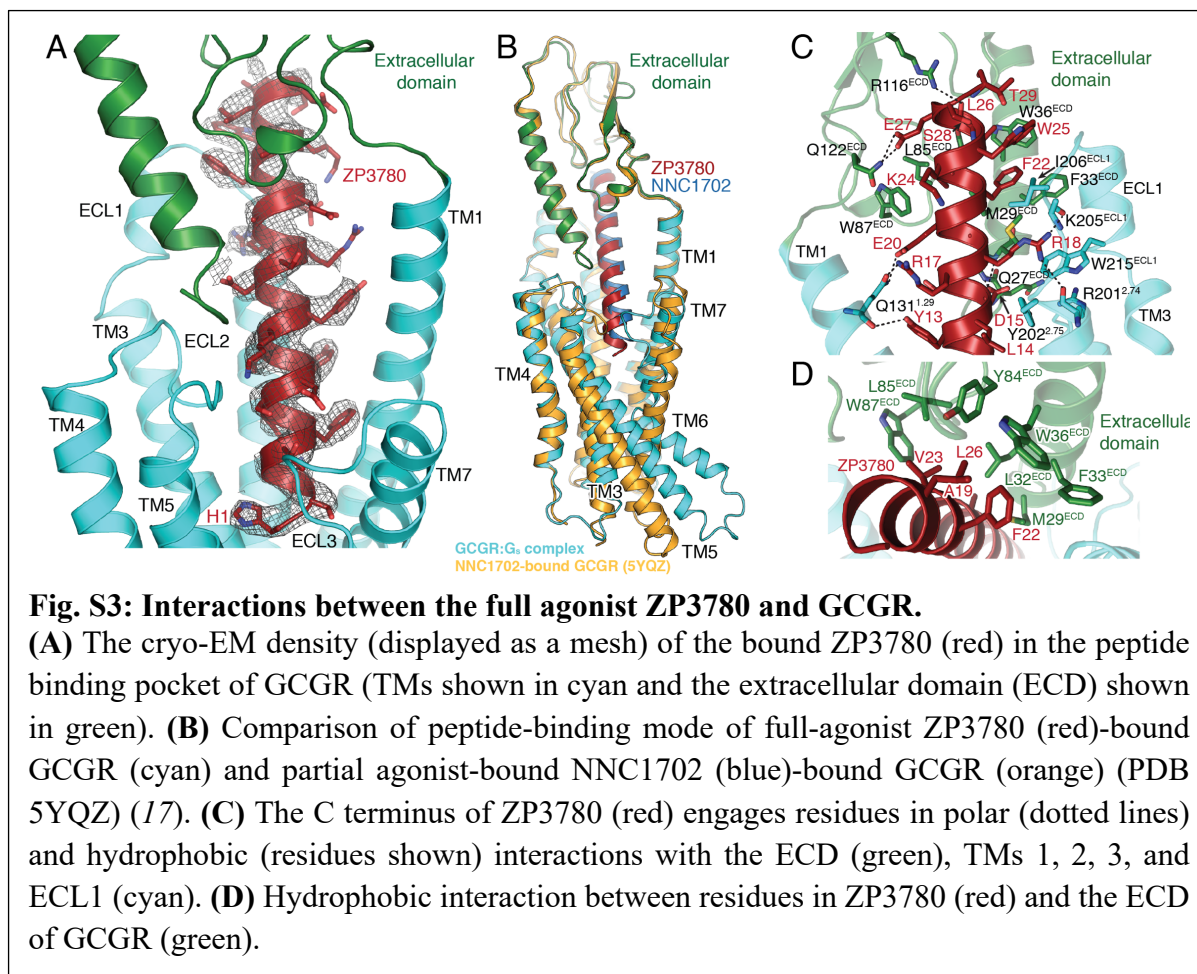

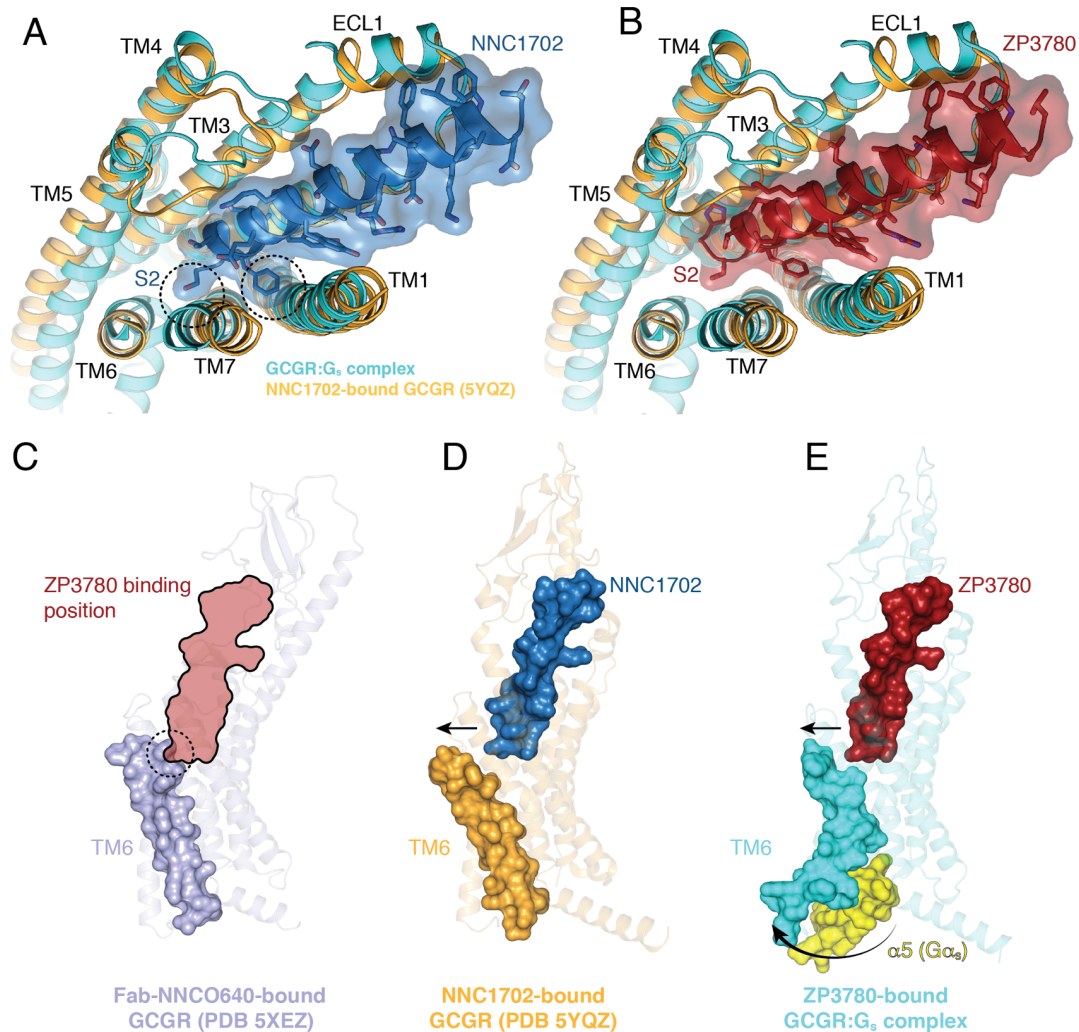

**Fig. S4: Peptide and G protein-induced conformational changes in transmembrane domain 6 of GCGR.**

Comparison of the ligand binding mode of NNC1702 (**A**) and ZP3780 (**B**). The N terminus of the partial agonist NNC1702 (blue), which lacks H1 and has a D9E mutation in comparison to the WT glucagon, binds closer to TM7 than the full agonist ZP3780 (red). While the inactive peptide-bound state of GCGR (yellow) (PDB 5YQZ) is compatible with binding of NNC1702, NNC1702 binding to the active conformation of GCGR (cyan) would lead to steric clashes of S2 and F6 with TM7 and TM1, respectively (highlighted with a dashed circles). The residues H1 and D9 of ZP3780 seem to cause the peptide to bind closer to TM3, which releases potential clashes and allows formation of the active conformation of TM1 and TM7 as seen in the GCGR-G<sub>s</sub> complex structure. (**C**) The binding position of ZP3780 (black outline based on the ZP3780-bound GCGR-G<sub>s</sub> complex structure (**E**)) overlaps with the C-terminal end of TM6 (highlighted with a dashed circle) in the Fab-bound inactive structure of GCGR (PDB 5XEZ, Fab and NNCO640 are not shown for clarity). (**D**) The extracellular tip of TM6 (orange) moves outward to accommodate NNC1702 (blue) binding in the partial agonist-bound GCGR structure (PDB 5YQZ). (**E**) In the GCGR-G<sub>s</sub> complex structure (cyan), the N and C termini of TM6 move away from the receptor core to accommodate ZP3780 (red) and the C-terminal α5 helix of Gα<sub>s</sub> (yellow), respectively. The necessity for the outward movement of both the extracellular and intracellular sides of TM6 to allow binding of the bulky peptide and G protein might result in the extreme kink formation in family B GPCRs.

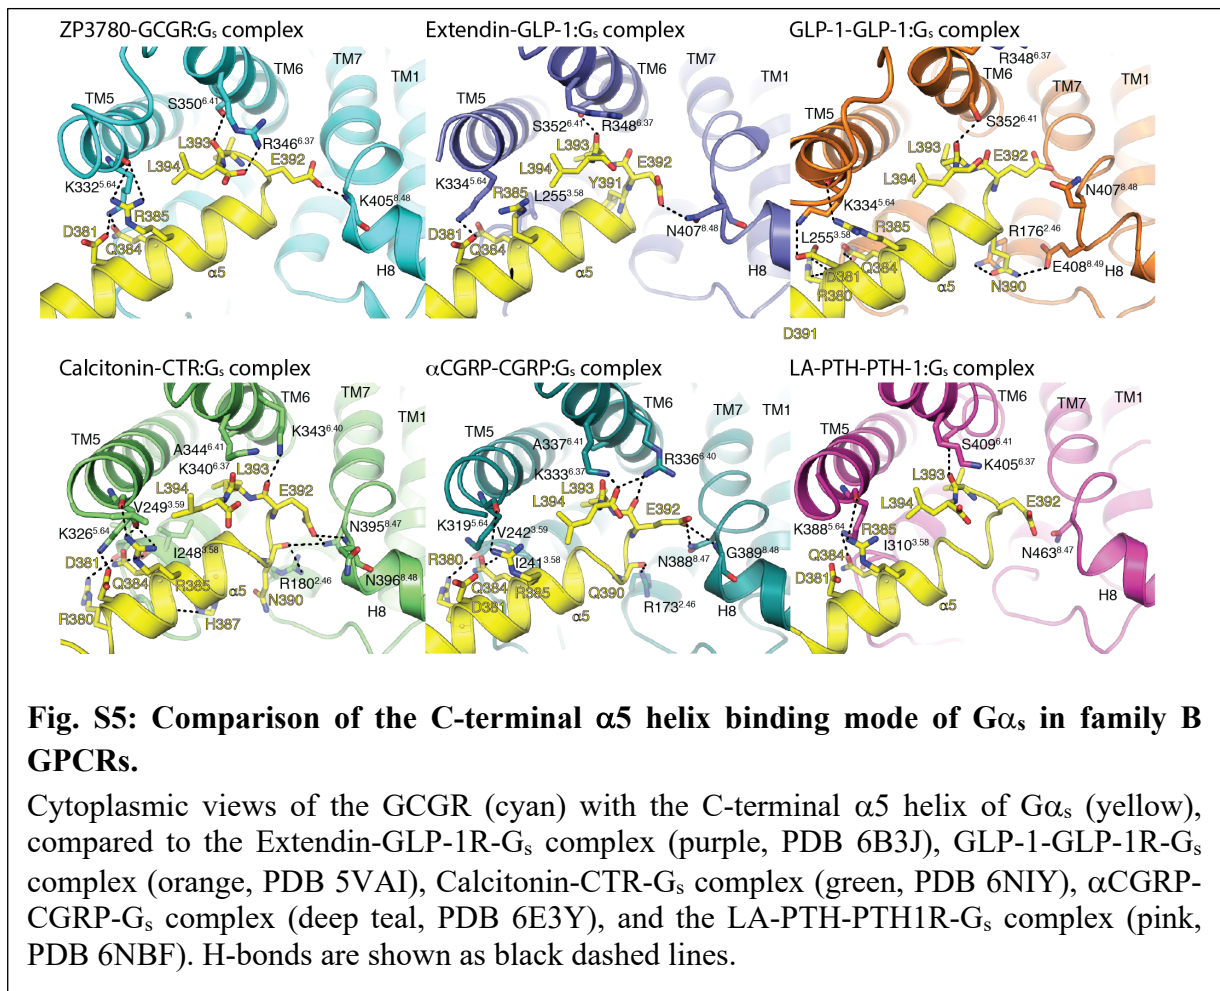

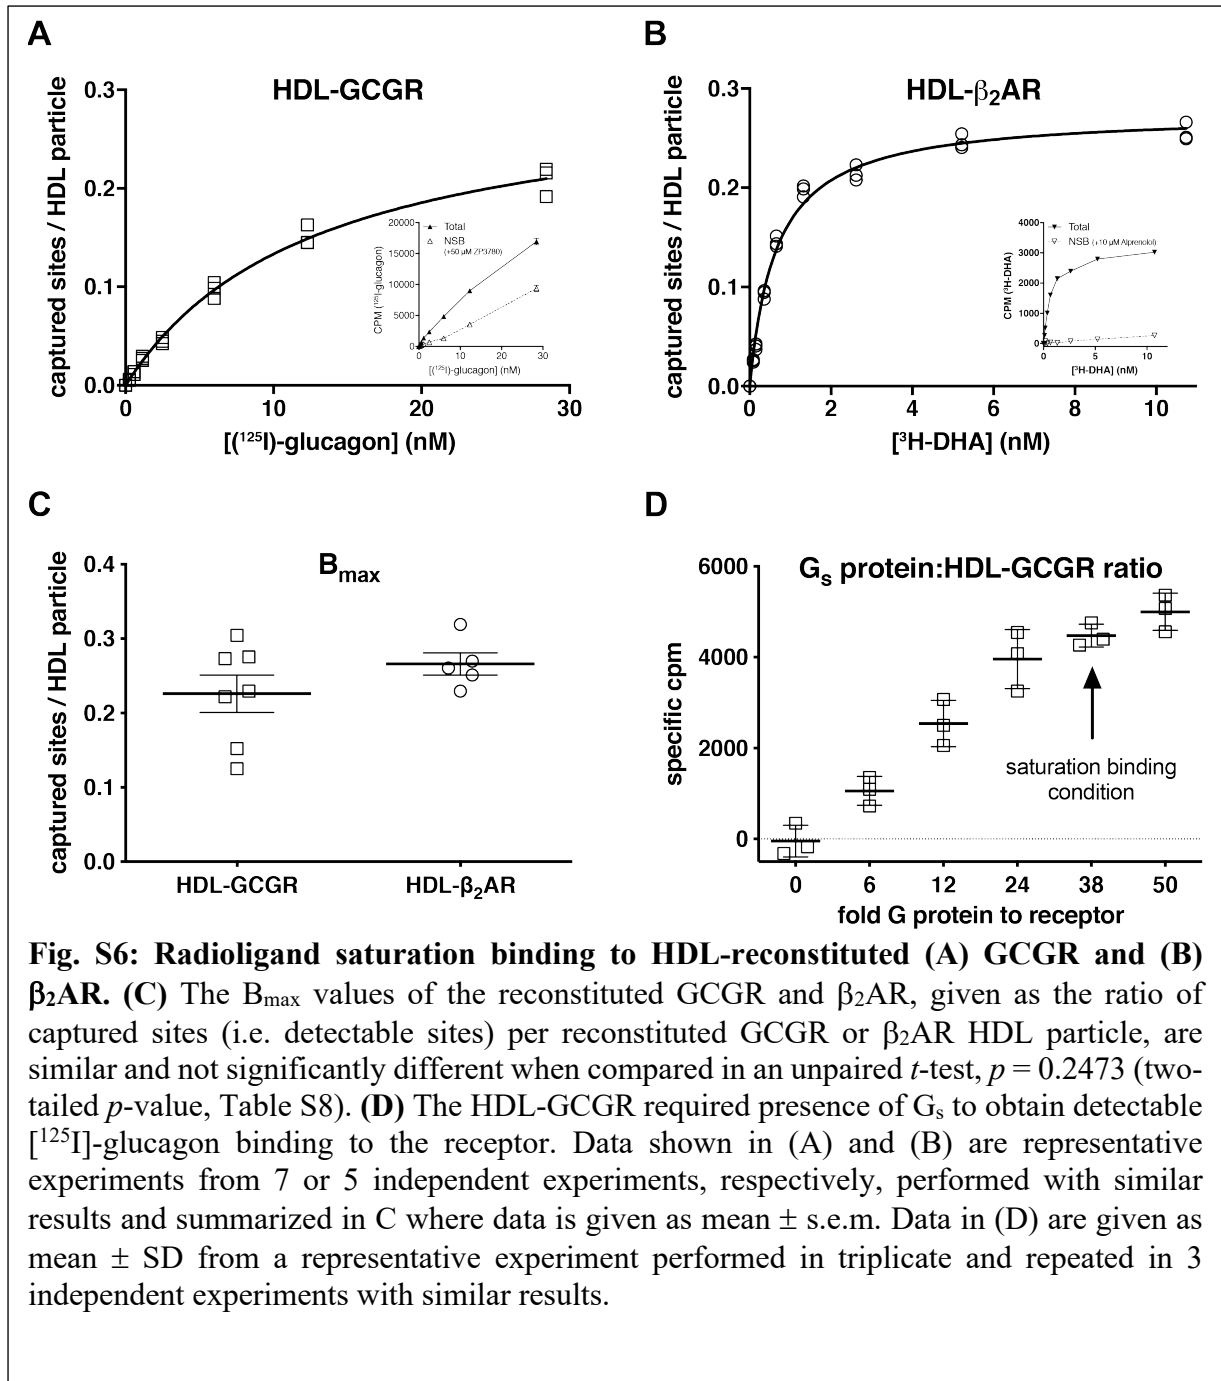

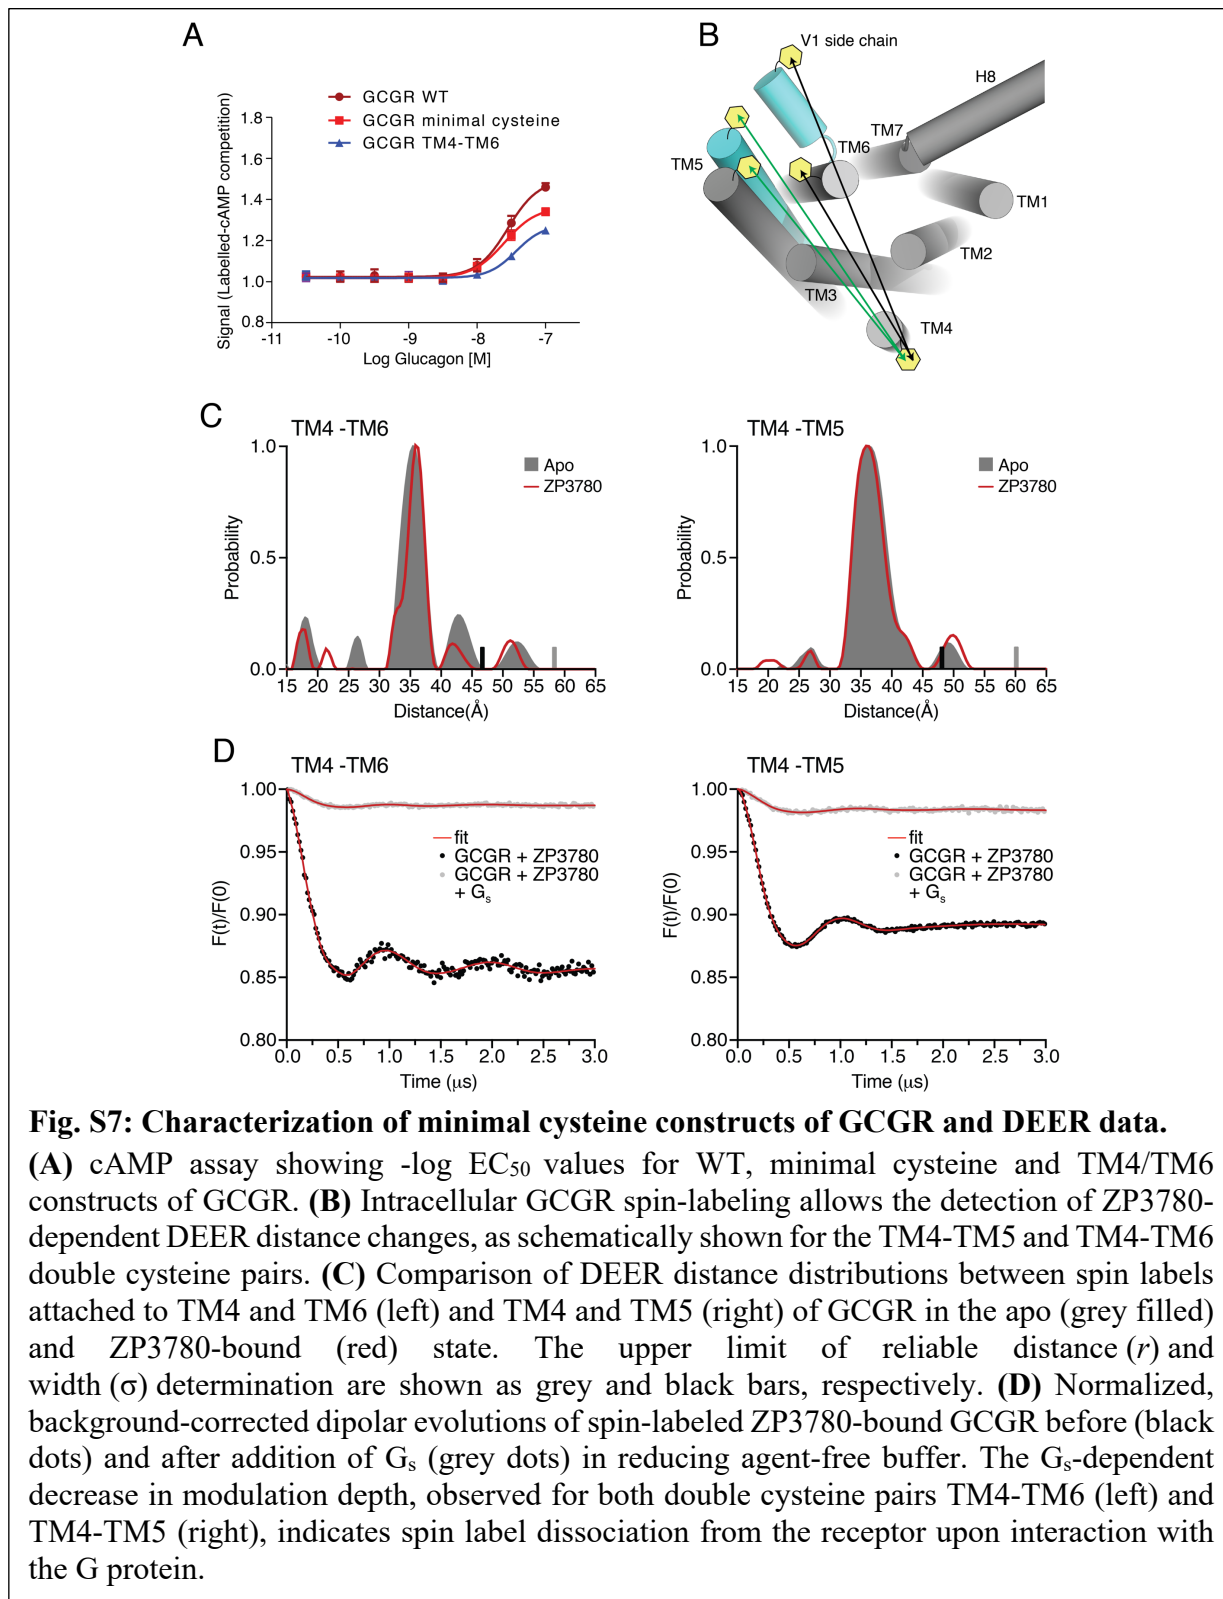



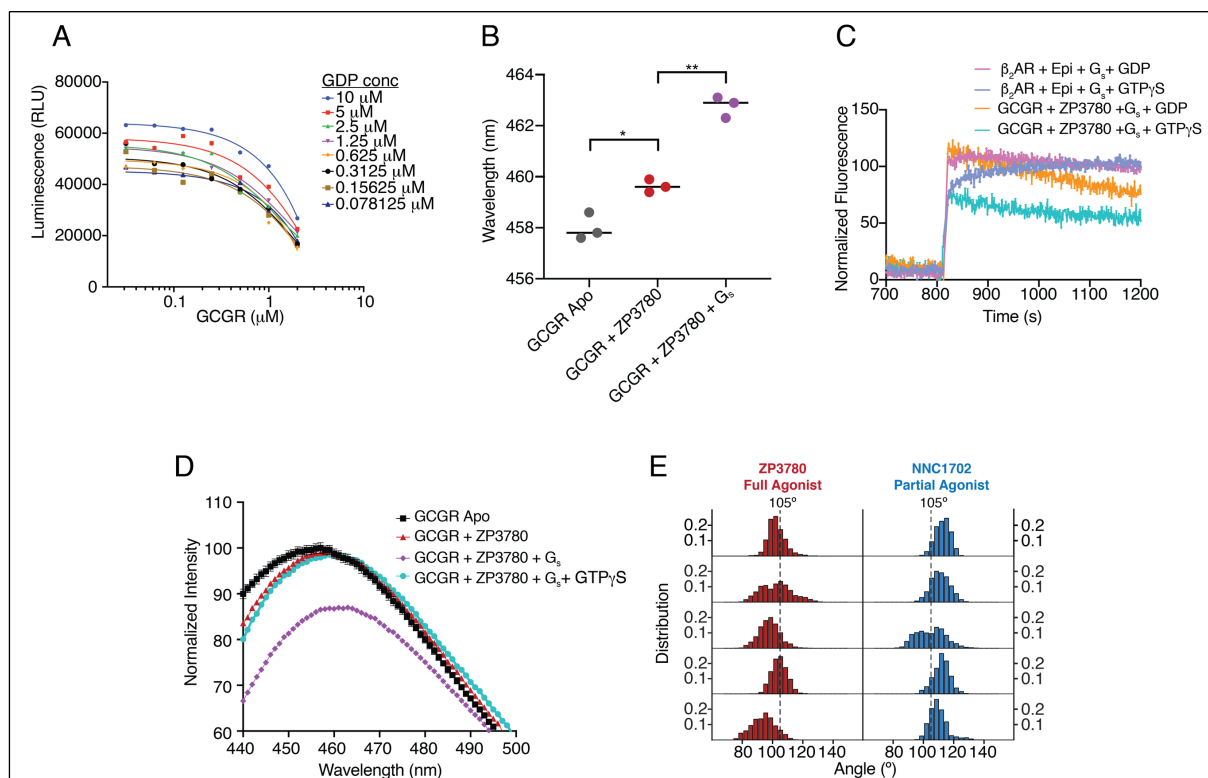

**Fig. S8: Effect of ligand and nucleotide on GCGR and  $G_s$  activation.**

(A) Effect of GDP on GCGR-induced  $G_s$  activation. In the presence of GCGR, increasing GDP concentration decreases GTP turnover in the *Glo-assay*, which is compensated by increasing receptor concentrations. (B) The difference in the  $\lambda_{\max}$  value between Apo and ZP3780-bound, bimane-labeled GCGR (TM6) is statistically significant (\*,  $p = 0.019$ ), as is the  $\lambda_{\max}$  value of ZP3780-bound and ZP3780 +  $G_s$  bound GCGR (\*\*,  $p = 0.001$ ). (C) In a FRET association assay with Cy3B-labeled receptors and Sulfo-Cyanine 5-labeled  $G_s$ , addition of nucleotide, GDP or  $GTP\gamma S$  results in dissociation of  $G_s$  from the receptors. GCGR (GDP: orange,  $GTP\gamma S$ : teal) and  $\beta_2AR$  (GDP: pink,  $GTP\gamma S$ : purple). (D) The fluorescence intensity of bimane-labeled GCGR (TM6) bound to ZP3780 and coupled to  $G_s$  (purple curve) increases after an 1-hour incubation of the complex with  $GTP\gamma S$  (cyan) to the level of ZP3780-bound GCGR in the absence of G protein (red). (E) MD simulations of GCGR (after  $G_s$  removal) showing the distribution of the angle between residues V368-G359-K344 of TM6. In the presence of ZP3780 (full agonist, red) TM6 remains more outward than in the presence of NNC1702 (partial agonist, blue). Shown are the plots of the angle distributions calculated for five independent simulations for each ligand condition.

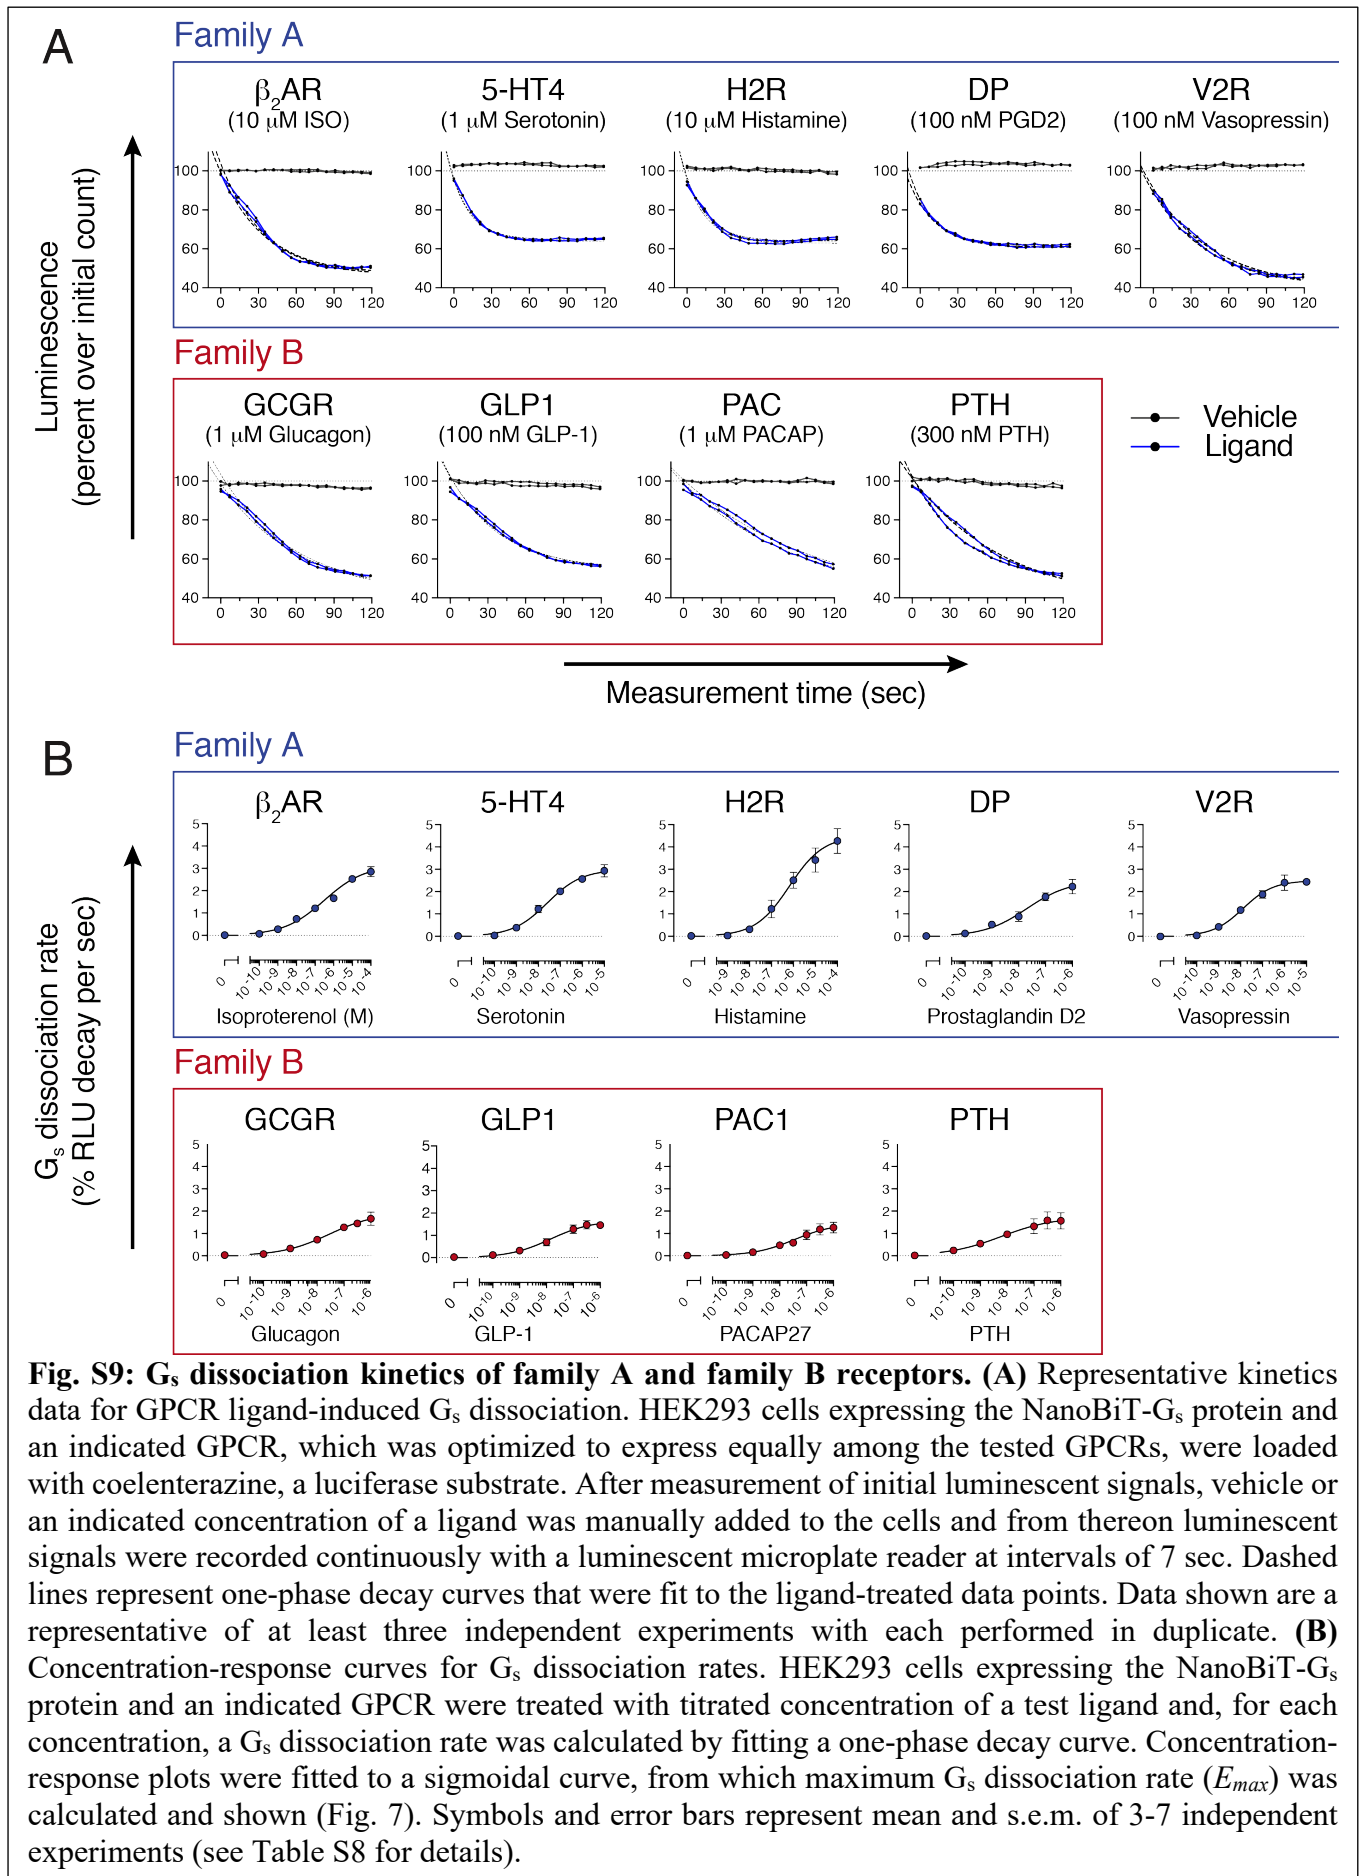

## **Supplemental Tables**

**Table S1: Solubility of glucagon and ZP3780 at different pH values.**

| <b>Buffer</b>    | <b>Glucagon</b>          | <b>ZP3780</b>          |
|------------------|--------------------------|------------------------|
| Acetate pH 4     | >1 mg ml <sup>-1</sup>   | >1 mg ml <sup>-1</sup> |
| Acetate pH 5     | >1 mg ml <sup>-1</sup>   | >1 mg ml <sup>-1</sup> |
| Phosphate pH 6   | <0.5 mg ml <sup>-1</sup> | >1 mg ml <sup>-1</sup> |
| Phosphate pH 7   | <0.5 mg ml <sup>-1</sup> | >1 mg ml <sup>-1</sup> |
| Phosphate pH 7.5 | <0.5 mg ml <sup>-1</sup> | >5 mg ml <sup>-1</sup> |
| Tris pH 7.5      | <0.5 mg ml <sup>-1</sup> | >1 mg ml <sup>-1</sup> |
| Tris pH 8        | Not tested               | >1 mg ml <sup>-1</sup> |
| Glycine pH 9     | Not tested               | >1 mg ml <sup>-1</sup> |

**Table S2: Comparison of the fibrillation of glucagon and ZP3780.**

|              | <b>Fibrillation</b>                |                 |
|--------------|------------------------------------|-----------------|
|              | <b>Aggregation lag time by ThT</b> |                 |
|              | <b>Glucagon</b>                    | <b>ZP3780</b>   |
|              | pH 2.5                             | pH 7.5          |
| No Agitation | 13.1 ± 1.0 hr                      | No fibrillation |
| Agitation    | 1.8 ± 0.2 hr                       | 19.6 ± 0.5 hr   |

<sup>a</sup>The fibrillation tendency was investigated using the fluorescent probe Thioflavin T (ThT), which detects the presence of amyloid fibrils.

<sup>b</sup>The aggregation propensity was accelerated using high temperature (40°C) combined with or without agitation.

**Table S3: Comparison of the binding affinity of glucagon and ZP3780.**

|          | <b>K<sub>i</sub> (nM)</b> | <b>pK<sub>i</sub> ± SEM</b> | <b><i>p</i>-value</b> | <b>n</b> |
|----------|---------------------------|-----------------------------|-----------------------|----------|
| Glucagon | 1.7                       | 8.76 ± 0.06                 |                       | 4        |
| ZP3780   | 6.9                       | 8.16 ± 0.04                 | <0.0001               | 4        |

<sup>a</sup>pK<sub>i</sub> values were determined by the Cheng-Prusov equation after non-linear regression of data to single binding site model.

<sup>b</sup>Average K<sub>i</sub>-values was calculated from the pK<sub>i</sub>.

<sup>c</sup>Data are given as mean ± s.e.m. from 4 independent experiments performed in duplicate or triplicate. Statistics was performed as an extra sum-of-squares *F* test.

**Table S4: Comparison of the EC<sub>50</sub> and E<sub>max</sub> values of glucagon and ZP3780 in GCGR-mediated cAMP signaling assays.**

|          | <b>EC<sub>50</sub><br/>(nM)</b> | <b>pEC<sub>50</sub> ±<br/>SEM</b> | <b>p-value</b> | <b>E<sub>max</sub> (nM<br/>cAMP) ±<br/>SEM</b> | <b>p-value</b> | <b>n</b> |
|----------|---------------------------------|-----------------------------------|----------------|------------------------------------------------|----------------|----------|
| Glucagon | 0.23                            | 9.64 ± 0.03                       |                | 23.4 ± 0.8                                     |                | 4        |
| ZP3780   | 0.33                            | 9.49 ± 0.06                       | 0.2237         | 23.0 ± 1.6                                     | 0.5929         | 4        |

<sup>a</sup>pEC<sub>50</sub> and E<sub>max</sub> values were determined by fitting data to a four-parameter dose-response curve.

<sup>b</sup>Hill slopes were 1.0 and 1.2 for glucagon and ZP3780, respectively, and not statistically different (extra sum-of-squares *F* test, *p* = 0.7892).

<sup>c</sup>Average EC<sub>50</sub>-value was calculated from the pEC<sub>50</sub>. E<sub>max</sub> was measured as nM cAMP pr. well.

<sup>d</sup>Data are given as mean ± s.e.m. from 4 independent experiments performed in duplicate.

<sup>e</sup>Statistics were performed as extra sum-of-squares *F* tests.

**Table S5: Data collection, model refinement and validation.**

| <b>Data Collection</b>                                   |                             |
|----------------------------------------------------------|-----------------------------|
| Voltage (kX)                                             | 300                         |
| Magnification                                            | 47,169                      |
| Total electron dose ( $e^-/\text{\AA}^2$ )               | 50                          |
| Defocus range ( $\mu\text{m}$ )                          | 1.2-2.2                     |
| Calibrated pixel size ( $\text{\AA}$ )                   | 1.06                        |
| Micrograph collected (no.)                               | 3,724                       |
| <b>Data processing</b>                                   |                             |
| Extracted particles (no.)                                | 2,039,910                   |
| Particles used for final reconstruction (no.)            | 296,516                     |
| Final map resolution ( $\text{\AA}$ , 0.143 FSC)         | 3.1                         |
| Map resolution range ( $\text{\AA}$ )                    | 2.8-3.6                     |
| Map sharpening B factor ( $\text{\AA}^2$ )               | Pre -90, post -30           |
| <b>Model content</b>                                     |                             |
| Initial models used (PBD code)                           | 5YQZ (GCGR), 5VAI (Gs/Nb35) |
| Total number of atoms                                    | 9,262                       |
| No. of protein residues                                  | 1,176                       |
| No. of ligands                                           | 0                           |
| <b>Model validation</b>                                  |                             |
| CC map vs. model (%)                                     | 80                          |
| RMSD                                                     |                             |
| Bond lengths ( $\text{\AA}$ ) / Bond angles ( $^\circ$ ) | 0.007/0.942                 |
| Ramachandran plot statistics                             |                             |
| Most favored (%)                                         | 94.13                       |
| Outliers (%)                                             | 0                           |
| Rotamer outliers (%)                                     | 0                           |
| C-beta deviations                                        | 0                           |
| Clash score                                              | 6.18                        |

**Table S6: cAMP accumulation assay for GCGR mutants and surface expression of GCGR mutants analyzed by cell surface ELISA.**

| GCGR  | EC <sub>50</sub> (nM) | pEC <sub>50</sub> ± SEM | <i>p</i> -value to WT | E <sub>max</sub> (% WT) ± SEM | <i>p</i> -value to WT | n | Surface expr. (% WT) ± SEM | <i>p</i> -value (to WT) | n |
|-------|-----------------------|-------------------------|-----------------------|-------------------------------|-----------------------|---|----------------------------|-------------------------|---|
| WT    | 0.14                  | 9.87 ± 0.11             |                       | 106 ± 3                       |                       | 8 | 96 ± 3                     |                         | 6 |
| Q232A | 51                    | 7.30 ± 0.07             | <0.0001               | 92 ± 3                        | 0.0407                | 6 | 101 ± 10                   | 0.9932 (ns)             | 6 |
| L242A | 3                     | 8.56 ± 0.19             | <0.0001               | 77 ± 5                        | 0.0006                | 3 | 96 ± 8                     | >0.9999 (ns)            | 3 |
| F322A | 111                   | 6.95 ± 0.17             | <0.0001               | 84 ± 8                        | 0.0065                | 3 | 78 ± 6                     | 0.3072 (ns)             | 3 |
| D370A | >100                  | n.d                     | n.d                   | >74                           | n.d                   | 3 | 108 ± 6                    | 0.7609 (ns)             | 3 |
| R378A | n.d                   | n.d                     | n.d                   | n.d                           | n.d                   | 3 | 103 ± 10                   | 0.9761 (ns)             | 3 |
| D385A | >100                  | n.d                     | n.d                   | >69                           | n.d                   | 6 | 82 ± 3                     | 0.4097 (ns)             | 6 |
| L395A | 0.82                  | 9.09 ± 0.19             | 0.0036                | 72 ± 4                        | <0.0001               | 3 | 82 ± 9                     | 0.6015 (ns)             | 3 |
| Y400F | 0.28                  | 9.55 ± 0.22             | 0.4126 (ns)           | 60 ± 3                        | <0.0001               | 3 | 78 ± 3                     | 0.3638 (ns)             | 3 |
| Mock  |                       |                         |                       |                               |                       |   | 6 ± 0.3                    | <0.0001                 | 6 |

<sup>a</sup>pEC<sub>50</sub> and E<sub>max</sub> values were determined by fitting data to a three-parameter dose-response curve. Average EC<sub>50</sub>-values were calculated from the pEC<sub>50</sub>. E<sub>max</sub> values were normalized to that of WT in each of the independent experiments.

<sup>b</sup>Data are given as mean ± s.e.m. from the indicated number of independent experiments performed in triplicate n.d, not determined, as parameter could not be reliably fitted.

<sup>c</sup>Statistics were performed by one-way ANOVA, followed by Dunnett's multiple comparisons test to the WT. Each *p*-value was adjusted to account for multiple comparisons. ns, not significant

**Table S7: Comparison of G<sub>s</sub> association and nucleotide binding and release rates between GCGR and  $\beta_2$ AR.**

|                                                                                  | <b>GCGR</b>       | <b><math>\beta_2</math>AR</b> | <b><i>p</i>-value</b> | <b>n</b> |
|----------------------------------------------------------------------------------|-------------------|-------------------------------|-----------------------|----------|
| <b>Max. GTP-turnover rate (GTP min<sup>-1</sup> G<sub>s</sub><sup>-1</sup>)</b>  | 0.1112 ± 0.0019   | 7.875 ± 0.1863                | <0.0001               | 9        |
| <b>FRET association (k<sub>on</sub> s<sup>-1</sup>)</b>                          | 0.0044 ± 0.0002   | 0.0077 ± 0.0006               | 0.0004                | 6        |
| <b>GDP release (k<sub>off</sub> s<sup>-1</sup>)</b>                              | 0.0022 ± 0.0002   | 0.042 ± 0.0077                | 0.0065                | 3        |
| <b>BODIPY-FL-GTP<math>\gamma</math>S binding (k<sub>on</sub> s<sup>-1</sup>)</b> | 0.00100 ± 0.00005 | 0.00296 ± 0.0002              | 0.0008                | 3        |

<sup>a</sup>Data are given as mean ± s.e.m from 3 or 9 independent experiments as indicated.

<sup>b</sup>Statistics were performed as Unpaired *t*-test.

**Table S8: Statistics for the determination of B<sub>max</sub> values from radioligand saturation binding experiments on  $\beta_2$ AR-HDL and GCGR-HDL particles.**

|                                   | <b>B<sub>max</sub> ± SEM</b> | <b>K<sub>d</sub> ± SEM</b> | <b>n</b> |
|-----------------------------------|------------------------------|----------------------------|----------|
| <b>GCGR-HDL</b>                   | 0.23 ± 0.03                  | 11.7 ± 2.2                 | 7        |
| <b><math>\beta_2</math>AR-HDL</b> | 0.27 ± 0.01                  | 1.1 ± 0.2                  | 5        |
| <b>Unpaired <i>t</i>-test</b>     |                              |                            |          |
| two tailed <i>p</i> -value        | 0.2473 (ns)                  |                            |          |

<sup>a</sup>B<sub>max</sub> values were compared in an unpaired *t*-test, and the two-tailed *p*-value given.

<sup>b</sup>Data are given as mean ± s.e.m from 7 or 5 independent experiments as indicated.

**Table S9: Comparison of G<sub>s</sub> dissociation rates and surface expression of different family A and family B GPCRs.**

|                 |              | <b>G<sub>s</sub> Dissociation</b> |          | <b>Surface expression</b>             |          |
|-----------------|--------------|-----------------------------------|----------|---------------------------------------|----------|
|                 |              | <b>(% RLU change per sec)</b>     |          | <b>(% <math>\beta_2</math>AR MFI)</b> |          |
|                 |              | <b>Mean ± SEM</b>                 | <b>n</b> | <b>Mean ± SEM</b>                     | <b>n</b> |
| <b>family A</b> | $\beta_2$ AR | 3.24 ± 0.33                       | 5        | 100                                   | 8        |
|                 | 5-HT4        | 3.07 ± 0.37                       | 5        | 92.2 ± 4.7                            | 4        |
|                 | DP           | 2.39 ± 0.32                       | 5        | 99.3 ± 3.7                            | 7        |
|                 | H2R          | 4.65 ± 0.56                       | 4        | 111.2 ± 5.5                           | 5        |
|                 | V2R          | 2.50 ± 0.12                       | 5        | 73.8 ± 5.5                            | 4        |
| <b>family B</b> | GCGR         | 2.01 ± 0.35                       | 5        | 99.8 ± 4.9                            | 4        |
|                 | GLP1         | 1.74 ± 0.13                       | 5        | 84.8 ± 5.1                            | 3        |
|                 | PAC1         | 1.40 ± 0.28                       | 5        | 102.7 ± 6.5                           | 7        |
|                 | PTH          | 1.62 ± 0.37                       | 5        | 109.6 ± 4.9                           | 3        |

## References and Notes

1. Y.-L. Liang, M. Khoshouei, G. Deganutti, A. Glukhova, C. Koole, T. S. Peat, M. Radjainia, J. M. Plitzko, W. Baumeister, L. J. Miller, D. L. Hay, A. Christopoulos, C. A. Reynolds, D. Wootten, P. M. Sexton, Cryo-EM structure of the active, G<sub>s</sub>-protein complexed, human CGRP receptor. *Nature* **561**, 492–497 (2018). [doi:10.1038/s41586-018-0535-y](https://doi.org/10.1038/s41586-018-0535-y) [Medline](#)
2. Y.-L. Liang, M. Khoshouei, A. Glukhova, S. G. B. Furness, P. Zhao, L. Clydesdale, C. Koole, T. T. Truong, D. M. Thal, S. Lei, M. Radjainia, R. Danev, W. Baumeister, M.-W. Wang, L. J. Miller, A. Christopoulos, P. M. Sexton, D. Wootten, Phase-plate cryo-EM structure of a biased agonist-bound human GLP-1 receptor-Gs complex. *Nature* **555**, 121–125 (2018). [doi:10.1038/nature25773](https://doi.org/10.1038/nature25773) [Medline](#)
3. Y.-L. Liang, M. Khoshouei, M. Radjainia, Y. Zhang, A. Glukhova, J. Tarrasch, D. M. Thal, S. G. B. Furness, G. Christopoulos, T. Coudrat, R. Danev, W. Baumeister, L. J. Miller, A. Christopoulos, B. K. Kobilka, D. Wootten, G. Skiniotis, P. M. Sexton, Phase-plate cryo-EM structure of a class B GPCR-G-protein complex. *Nature* **546**, 118–123 (2017). [doi:10.1038/nature22327](https://doi.org/10.1038/nature22327) [Medline](#)
4. Y. Zhang, B. Sun, D. Feng, H. Hu, M. Chu, Q. Qu, J. T. Tarrasch, S. Li, T. Sun Kobilka, B. K. Kobilka, G. Skiniotis, Cryo-EM structure of the activated GLP-1 receptor in complex with a G protein. *Nature* **546**, 248–253 (2017). [doi:10.1038/nature22394](https://doi.org/10.1038/nature22394) [Medline](#)
5. L.-H. Zhao, S. Ma, I. Sutkeviciute, D.-D. Shen, X. E. Zhou, P. W. de Waal, C.-Y. Li, Y. Kang, L. J. Clark, F. G. Jean-Alphonse, A. D. White, D. Yang, A. Dai, X. Cai, J. Chen, C. Li, Y. Jiang, T. Watanabe, T. J. Gardella, K. Melcher, M.-W. Wang, J.-P. Vilardaga, H. E. Xu, Y. Zhang, Structure and dynamics of the active human parathyroid hormone receptor-1. *Science* **364**, 148–153 (2019). [doi:10.1126/science.aav7942](https://doi.org/10.1126/science.aav7942) [Medline](#)
6. G. Jiang, B. B. Zhang, Glucagon and regulation of glucose metabolism. *Am. J. Physiol. Endocrinol. Metab.* **284**, E671–E678 (2003). [doi:10.1152/ajpendo.00492.2002](https://doi.org/10.1152/ajpendo.00492.2002) [Medline](#)
7. K. Hollenstein, C. de Graaf, A. Bortolato, M.-W. Wang, F. H. Marshall, R. C. Stevens, Insights into the structure of class B GPCRs. *Trends Pharmacol. Sci.* **35**, 12–22 (2014). [doi:10.1016/j.tips.2013.11.001](https://doi.org/10.1016/j.tips.2013.11.001) [Medline](#)
8. L. J. Jelinek, S. Lok, G. B. Rosenberg, R. A. Smith, F. J. Grant, S. Biggs, P. A. Bensch, J. L. Kuijper, P. O. Sheppard, C. A. Sprecher, et, Expression cloning and signaling properties of the rat glucagon receptor. *Science* **259**, 1614–1616 (1993). [doi:10.1126/science.8384375](https://doi.org/10.1126/science.8384375) [Medline](#)
9. K. E. Mayo, L. J. Miller, D. Bataille, S. Dalle, B. Göke, B. Thorens, D. J. Drucker, International Union of Pharmacology. XXXV. The glucagon receptor family. *Pharmacol. Rev.* **55**, 167–194 (2003). [doi:10.1124/pr.55.1.6](https://doi.org/10.1124/pr.55.1.6) [Medline](#)
10. T. D. Müller, B. Finan, C. Clemmensen, R. D. DiMarchi, M. H. Tschöp, The New Biology and Pharmacology of Glucagon. *Physiol. Rev.* **97**, 721–766 (2017). [doi:10.1152/physrev.00025.2016](https://doi.org/10.1152/physrev.00025.2016) [Medline](#)
11. P. E. Cryer, S. N. Davis, H. Shamoon, Hypoglycemia in diabetes. *Diabetes Care* **26**, 1902–1912 (2003). [doi:10.2337/diacare.26.6.1902](https://doi.org/10.2337/diacare.26.6.1902) [Medline](#)



12. Y. M. Cho, C. E. Merchant, T. J. Kieffer, Targeting the glucagon receptor family for diabetes and obesity therapy. *Pharmacol. Ther.* **135**, 247–278 (2012).  
[doi:10.1016/j.pharmthera.2012.05.009](https://doi.org/10.1016/j.pharmthera.2012.05.009) [Medline](#)
13. J. H. Exton, G. A. Robison, E. W. Sutherland, C. R. Park, Studies on the role of adenosine 3',5'-monophosphate in the hepatic actions of glucagon and catecholamines. *J. Biol. Chem.* **246**, 6166–6177 (1971). [Medline](#)
14. J. S. Pedersen, D. Dikov, J. L. Flink, H. A. Hjuler, G. Christiansen, D. E. Otzen, The changing face of glucagon fibrillation: Structural polymorphism and conformational imprinting. *J. Mol. Biol.* **355**, 501–523 (2006). [doi:10.1016/j.jmb.2005.09.100](https://doi.org/10.1016/j.jmb.2005.09.100) [Medline](#)
15. U. Hövelmann, B. V. Bysted, U. Mouritzen, F. Macchi, D. Lamers, B. Kronshage, D. V. Møller, T. Heise, Pharmacokinetic and pharmacodynamic characteristics of dasiglucagon, a novel soluble and stable glucagon analog. *Diabetes Care* **41**, 531–537 (2018).  
[doi:10.2337/dc17-1402](https://doi.org/10.2337/dc17-1402) [Medline](#)
16. C. G. Unson, Molecular determinants of glucagon receptor signaling. *Biopolymers* **66**, 218–235 (2002). [doi:10.1002/bip.10259](https://doi.org/10.1002/bip.10259) [Medline](#)
17. H. Zhang, A. Qiao, L. Yang, N. Van Eps, K. S. Frederiksen, D. Yang, A. Dai, X. Cai, H. Zhang, C. Yi, C. Cao, L. He, H. Yang, J. Lau, O. P. Ernst, M. A. Hanson, R. C. Stevens, M.-W. Wang, S. Reedtz-Runge, H. Jiang, Q. Zhao, B. Wu, Structure of the glucagon receptor in complex with a glucagon analogue. *Nature* **553**, 106–110 (2018).  
[doi:10.1038/nature25153](https://doi.org/10.1038/nature25153) [Medline](#)
18. C. M. Koth, J. M. Murray, S. Mukund, A. Madjidi, A. Minn, H. J. Clarke, T. Wong, V. Chiang, E. Luis, A. Estevez, J. Rondon, Y. Zhang, I. Hötzel, B. B. Allan, Molecular basis for negative regulation of the glucagon receptor. *Proc. Natl. Acad. Sci. U.S.A.* **109**, 14393–14398 (2012). [doi:10.1073/pnas.1206734109](https://doi.org/10.1073/pnas.1206734109) [Medline](#)
19. H. Zhang, A. Qiao, D. Yang, L. Yang, A. Dai, C. de Graaf, S. Reedtz-Runge, V. Dharmarajan, H. Zhang, G. W. Han, T. D. Grant, R. G. Sierra, U. Weierstall, G. Nelson, W. Liu, Y. Wu, L. Ma, X. Cai, G. Lin, X. Wu, Z. Geng, Y. Dong, G. Song, P. R. Griffin, J. Lau, V. Cherezov, H. Yang, M. A. Hanson, R. C. Stevens, Q. Zhao, H. Jiang, M.-W. Wang, B. Wu, Structure of the full-length glucagon class B G-protein-coupled receptor. *Nature* **546**, 259–264 (2017). [doi:10.1038/nature22363](https://doi.org/10.1038/nature22363) [Medline](#)
20. D. Wootten, J. Simms, L. J. Miller, A. Christopoulos, P. M. Sexton, Polar transmembrane interactions drive formation of ligand-specific and signal pathway-biased family B G protein-coupled receptor conformations. *Proc. Natl. Acad. Sci. U.S.A.* **110**, 5211–5216 (2013). [doi:10.1073/pnas.1221585110](https://doi.org/10.1073/pnas.1221585110) [Medline](#)
21. C. G. Unson, D. Andreu, E. M. Gurzenda, R. B. Merrifield, Synthetic peptide antagonists of glucagon. *Proc. Natl. Acad. Sci. U.S.A.* **84**, 4083–4087 (1987).  
[doi:10.1073/pnas.84.12.4083](https://doi.org/10.1073/pnas.84.12.4083) [Medline](#)
22. C. G. Unson, E. M. Gurzenda, R. B. Merrifield, Biological activities of des-His1[Glu9]glucagon amide, a glucagon antagonist. *Peptides* **10**, 1171–1177 (1989).  
[doi:10.1016/0196-9781\(89\)90010-7](https://doi.org/10.1016/0196-9781(89)90010-7) [Medline](#)

23. C. G. Unson, D. Macdonald, K. Ray, T. L. Durrah, R. B. Merrifield, Position 9 replacement analogs of glucagon uncouple biological activity and receptor binding. *J. Biol. Chem.* **266**, 2763–2766 (1991). [Medline](#)
24. E. Dal Maso, Y. Zhu, V. Pham, C. A. Reynolds, G. Deganutti, C. A. Hick, D. Yang, A. Christopoulos, D. L. Hay, M.-W. Wang, P. M. Sexton, S. G. B. Furness, D. Wootten, Extracellular loops 2 and 3 of the calcitonin receptor selectively modify agonist binding and efficacy. *Biochem. Pharmacol.* **150**, 214–244 (2018). [doi:10.1016/j.bcp.2018.02.005](https://doi.org/10.1016/j.bcp.2018.02.005) [Medline](#)
25. F. Y. Siu, M. He, C. de Graaf, G. W. Han, D. Yang, Z. Zhang, C. Zhou, Q. Xu, D. Wacker, J. S. Joseph, W. Liu, J. Lau, V. Cherezov, V. Katritch, M.-W. Wang, R. C. Stevens, Structure of the human glucagon class B G-protein-coupled receptor. *Nature* **499**, 444–449 (2013). [doi:10.1038/nature12393](https://doi.org/10.1038/nature12393) [Medline](#)
26. C. de Graaf, G. Song, C. Cao, Q. Zhao, M.-W. Wang, B. Wu, R. C. Stevens, Extending the structural view of class B GPCRs. *Trends Biochem. Sci.* **42**, 946–960 (2017). [doi:10.1016/j.tibs.2017.10.003](https://doi.org/10.1016/j.tibs.2017.10.003) [Medline](#)
27. A. Glukhova, C. J. Draper-Joyce, R. K. Sunahara, A. Christopoulos, D. Wootten, P. M. Sexton, Rules of engagement: GPCRs and G proteins. *ACS Pharmacol. Transl. Sci.* **1**, 73–83 (2018). [doi:10.1021/acspsci.8b00026](https://doi.org/10.1021/acspsci.8b00026) [Medline](#)
28. Y. Du, N. M. Duc, S. G. F. Rasmussen, D. Hilger, X. Kubiak, L. Wang, J. Bohon, H. R. Kim, M. Wegrecki, A. Asuru, K. M. Jeong, J. Lee, M. R. Chance, D. T. Lodowski, B. K. Kobilka, K. Y. Chung, Assembly of a GPCR-G protein complex. *Cell* **177**, 1232–1242.e11 (2019). [doi:10.1016/j.cell.2019.04.022](https://doi.org/10.1016/j.cell.2019.04.022) [Medline](#)
29. A. Manglik, A. C. Kruse, Structural Basis for G Protein-Coupled Receptor Activation. *Biochemistry* **56**, 5628–5634 (2017). [doi:10.1021/acs.biochem.7b00747](https://doi.org/10.1021/acs.biochem.7b00747) [Medline](#)
30. G. G. Gregorio, M. Masureel, D. Hilger, D. S. Terry, M. Juette, H. Zhao, Z. Zhou, J. M. Perez-Aguilar, M. Hauge, S. Mathiasen, J. A. Javitch, H. Weinstein, B. K. Kobilka, S. C. Blanchard, Single-molecule analysis of ligand efficacy in  $\beta_2$ AR-G-protein activation. *Nature* **547**, 68–73 (2017). [doi:10.1038/nature22354](https://doi.org/10.1038/nature22354) [Medline](#)
31. F. J. Rojas, L. Birnbaumer, Regulation of glucagon receptor binding. Lack of effect of Mg and preferential role for GDP. *J. Biol. Chem.* **260**, 7829–7835 (1985). [Medline](#)
32. R. Seifert, U. Gether, K. Wenzel-Seifert, B. K. Kobilka, Effects of guanine, inosine, and xanthine nucleotides on  $\beta_2$ -adrenergic receptor/G<sub>s</sub> interactions: Evidence for multiple receptor conformations. *Mol. Pharmacol.* **56**, 348–358 (1999). [doi:10.1124/mol.56.2.348](https://doi.org/10.1124/mol.56.2.348) [Medline](#)
33. A. Inoue, F. Raimondi, F. M. N. Kadji, G. Singh, T. Kishi, A. Uwamizu, Y. Ono, Y. Shinjo, S. Ishida, N. Arang, K. Kawakami, J. S. Gutkind, J. Aoki, R. B. Russell, Illuminating G-protein-coupling selectivity of GPCRs. *Cell* **177**, 1933–1947.e25 (2019). [doi:10.1016/j.cell.2019.04.044](https://doi.org/10.1016/j.cell.2019.04.044) [Medline](#)
34. D. S. Serafin, N. R. Harris, N. R. Nielsen, D. I. Mackie, K. M. Caron, Dawn of a New RAMPage. *Trends Pharmacol. Sci.* **41**, 249–265 (2020). [doi:10.1016/j.tips.2020.01.009](https://doi.org/10.1016/j.tips.2020.01.009) [Medline](#)

35. E. Lorenzen, T. Dodig-Crnković, I. B. Kotliar, E. Pin, E. Ceraudo, R. D. Vaughan, M. Uhlèn, T. Huber, J. M. Schwenk, T. P. Sakmar, Multiplexed analysis of the secretin-like GPCR-RAMP interactome. *Sci. Adv.* **5**, eaaw2778 (2019). [doi:10.1126/sciadv.aaw2778](https://doi.org/10.1126/sciadv.aaw2778) [Medline](#)
36. G. Jeschke, DEER distance measurements on proteins. *Annu. Rev. Phys. Chem.* **63**, 419–446 (2012). [doi:10.1146/annurev-physchem-032511-143716](https://doi.org/10.1146/annurev-physchem-032511-143716) [Medline](#)
37. L. Sušac, M. T. Eddy, T. Didenko, R. C. Stevens, K. Wüthrich, A<sub>2A</sub> adenosine receptor functional states characterized by <sup>19</sup>F-NMR. *Proc. Natl. Acad. Sci. U.S.A.* **115**, 12733–12738 (2018). [doi:10.1073/pnas.1813649115](https://doi.org/10.1073/pnas.1813649115) [Medline](#)
38. A. Manglik, T. H. Kim, M. Masureel, C. Altenbach, Z. Yang, D. Hilger, M. T. Lerch, T. S. Kobilka, F. S. Thian, W. L. Hubbell, R. S. Prosser, B. K. Kobilka, Structural insights into the dynamic process of  $\beta$ 2-adrenergic receptor signaling. *Cell* **161**, 1101–1111 (2015). [doi:10.1016/j.cell.2015.04.043](https://doi.org/10.1016/j.cell.2015.04.043) [Medline](#)
39. J. Okude, T. Ueda, Y. Kofuku, M. Sato, N. Nobuyama, K. Kondo, Y. Shiraishi, T. Mizumura, K. Onishi, M. Natsume, M. Maeda, H. Tsujishita, T. Kuranaga, M. Inoue, I. Shimada, Identification of a conformational equilibrium that determines the efficacy and functional selectivity of the  $\mu$ -opioid receptor. *Angew. Chem. Int. Ed.* **54**, 15771–15776 (2015). [doi:10.1002/anie.201508794](https://doi.org/10.1002/anie.201508794) [Medline](#)
40. R. Sounier, C. Mas, J. Steyaert, T. Laeremans, A. Manglik, W. Huang, B. K. Kobilka, H. Déméné, S. Granier, Propagation of conformational changes during  $\mu$ -opioid receptor activation. *Nature* **524**, 375–378 (2015). [doi:10.1038/nature14680](https://doi.org/10.1038/nature14680) [Medline](#)
41. L. M. Wingler, M. Elgeti, D. Hilger, N. R. Latorraca, M. T. Lerch, D. P. Staus, R. O. Dror, B. K. Kobilka, W. L. Hubbell, R. J. Lefkowitz, Angiotensin analogs with divergent bias stabilize distinct receptor conformations. *Cell* **176**, 468–478.e11 (2019). [doi:10.1016/j.cell.2018.12.005](https://doi.org/10.1016/j.cell.2018.12.005) [Medline](#)
42. L. Ye, N. Van Eps, M. Zimmer, O. P. Ernst, R. S. Prosser, Activation of the A<sub>2A</sub> adenosine G-protein-coupled receptor by conformational selection. *Nature* **533**, 265–268 (2016). [doi:10.1038/nature17668](https://doi.org/10.1038/nature17668) [Medline](#)
43. J. F. Fay, D. L. Farrens, Purification of functional CB<sub>1</sub> and analysis by site-directed fluorescence labeling methods. *Methods Enzymol.* **593**, 343–370 (2017). [doi:10.1016/bs.mie.2017.06.026](https://doi.org/10.1016/bs.mie.2017.06.026) [Medline](#)
44. C. T. Schafer, J. F. Fay, J. M. Janz, D. L. Farrens, Decay of an active GPCR: Conformational dynamics govern agonist rebinding and persistence of an active, yet empty, receptor state. *Proc. Natl. Acad. Sci. U.S.A.* **113**, 11961–11966 (2016). [doi:10.1073/pnas.1606347113](https://doi.org/10.1073/pnas.1606347113) [Medline](#)
45. X. J. Yao, G. Vélez Ruiz, M. R. Whorton, S. G. F. Rasmussen, B. T. DeVree, X. Deupi, R. K. Sunahara, B. Kobilka, The effect of ligand efficacy on the formation and stability of a GPCR-G protein complex. *Proc. Natl. Acad. Sci. U.S.A.* **106**, 9501–9506 (2009). [doi:10.1073/pnas.0811437106](https://doi.org/10.1073/pnas.0811437106) [Medline](#)
46. R. O. Dror, D. H. Arlow, P. Maragakis, T. J. Mildorf, A. C. Pan, H. Xu, D. W. Borhani, D. E. Shaw, Activation mechanism of the  $\beta$ 2-adrenergic receptor. *Proc. Natl. Acad. Sci. U.S.A.* **108**, 18684–18689 (2011). [doi:10.1073/pnas.1110499108](https://doi.org/10.1073/pnas.1110499108) [Medline](#)

47. T. M. Gupte, M. Ritt, M. Dysthe, R. U. Malik, S. Sivaramakrishnan, Minute-scale persistence of a GPCR conformation state triggered by non-cognate G protein interactions primes signaling. *Nat. Commun.* **10**, 4836 (2019). [doi:10.1038/s41467-019-12755-9](https://doi.org/10.1038/s41467-019-12755-9) [Medline](#)
48. C. P. Kimball, J. R. Murlin, Aqueous extracts of pancreas III. Some precipitation reactions of insulin. *J. Biol. Chem.* **58**, 337–346 (1923).
49. Y. Yin, P. W. de Waal, Y. He, L.-H. Zhao, D. Yang, X. Cai, Y. Jiang, K. Melcher, M.-W. Wang, H. E. Xu, Rearrangement of a polar core provides a conserved mechanism for constitutive activation of class B G protein-coupled receptors. *J. Biol. Chem.* **292**, 9865–9881 (2017). [doi:10.1074/jbc.M117.782987](https://doi.org/10.1074/jbc.M117.782987) [Medline](#)
50. S. G. F. Rasmussen, B. T. DeVree, Y. Zou, A. C. Kruse, K. Y. Chung, T. S. Kobilka, F. S. Thian, P. S. Chae, E. Pardon, D. Calinski, J. M. Mathiesen, S. T. A. Shah, J. A. Lyons, M. Caffrey, S. H. Gellman, J. Steyaert, G. Skiniotis, W. I. Weis, R. K. Sunahara, B. K. Kobilka, Crystal structure of the  $\beta_2$  adrenergic receptor-Gs protein complex. *Nature* **477**, 549–555 (2011). [doi:10.1038/nature10361](https://doi.org/10.1038/nature10361) [Medline](#)
51. A. Koehl, H. Hu, D. Feng, B. Sun, Y. Zhang, M. J. Robertson, M. Chu, T. S. Kobilka, T. Laeremans, J. Steyaert, J. Tarrasch, S. Dutta, R. Fonseca, W. I. Weis, J. M. Mathiesen, G. Skiniotis, B. K. Kobilka, Structural insights into the activation of metabotropic glutamate receptors. *Nature* **566**, 79–84 (2019). [doi:10.1038/s41586-019-0881-4](https://doi.org/10.1038/s41586-019-0881-4) [Medline](#)
52. D. P. Staus, L. M. Wingler, M. Choi, B. Pani, A. Manglik, A. C. Kruse, R. J. Lefkowitz, Sortase ligation enables homogeneous GPCR phosphorylation to reveal diversity in  $\beta$ -arrestin coupling. *Proc. Natl. Acad. Sci. U.S.A.* **115**, 3834–3839 (2018). [doi:10.1073/pnas.1722336115](https://doi.org/10.1073/pnas.1722336115) [Medline](#)
53. S. Q. Zheng, E. Palovcak, J.-P. Armache, K. A. Verba, Y. Cheng, D. A. Agard, MotionCor2: Anisotropic correction of beam-induced motion for improved cryo-electron microscopy. *Nat. Methods* **14**, 331–332 (2017). [doi:10.1038/nmeth.4193](https://doi.org/10.1038/nmeth.4193) [Medline](#)
54. K. Zhang, Gctf: Real-time CTF determination and correction. *J. Struct. Biol.* **193**, 1–12 (2016). [doi:10.1016/j.jsb.2015.11.003](https://doi.org/10.1016/j.jsb.2015.11.003) [Medline](#)
55. J. Zivanov, T. Nakane, B. O. Forsberg, D. K. Elife, 2018, New tools for automated high-resolution cryo-EM structure determination in RELION-3. *eLife* **7**, e42166 (2018).
56. T. Grant, A. Rohou, N. G. Elife, 2018, cisTEM, user-friendly software for single-particle image processing. *eLife* **7**, e35383 (2018).
57. J. B. Heymann, Guidelines for using Bsoft for high resolution reconstruction and validation of biomolecular structures from electron micrographs. *Protein Sci.* **27**, 159–171 (2018). [doi:10.1002/pro.3293](https://doi.org/10.1002/pro.3293) [Medline](#)
58. E. F. Pettersen, T. D. Goddard, C. C. Huang, G. S. Couch, D. M. Greenblatt, E. C. Meng, T. E. Ferrin, UCSF Chimera—A visualization system for exploratory research and analysis. *J. Comput. Chem.* **25**, 1605–1612 (2004). [doi:10.1002/jcc.20084](https://doi.org/10.1002/jcc.20084) [Medline](#)
59. P. Emsley, K. Cowtan, *Coot*: Model-building tools for molecular graphics. *Acta Crystallogr. D Biol. Crystallogr.* **60**, 2126–2132 (2004). [doi:10.1107/S0907444904019158](https://doi.org/10.1107/S0907444904019158) [Medline](#)

60. P. D. Adams, P. V. Afonine, G. Bunkóczi, V. B. Chen, N. Echols, J. J. Headd, L.-W. Hung, S. Jain, G. J. Kapral, R. W. Grosse Kunstleve, A. J. McCoy, N. W. Moriarty, R. D. Oeffner, R. J. Read, D. C. Richardson, J. S. Richardson, T. C. Terwilliger, P. H. Zwart, The Phenix software for automated determination of macromolecular structures. *Methods* **55**, 94–106 (2011). [doi:10.1016/j.ymeth.2011.07.005](https://doi.org/10.1016/j.ymeth.2011.07.005) [Medline](#)
61. C. J. Williams, J. J. Headd, N. W. Moriarty, M. G. Prisant, L. L. Videau, L. N. Deis, V. Verma, D. A. Keedy, B. J. Hintze, V. B. Chen, S. Jain, S. M. Lewis, W. B. Arendall 3rd, J. Snoeyink, P. D. Adams, S. C. Lovell, J. S. Richardson, D. C. Richardson, MolProbity: More and better reference data for improved all-atom structure validation. *Protein Sci.* **27**, 293–315 (2018). [doi:10.1002/pro.3330](https://doi.org/10.1002/pro.3330) [Medline](#)
62. M. Pannier, S. Veit, A. Godt, G. Jeschke, H. W. Spiess, Dead-time free measurement of dipole-dipole interactions between electron spins. *J. Magn. Reson.* **142**, 331–340 (2000). [doi:10.1006/jmre.1999.1944](https://doi.org/10.1006/jmre.1999.1944) [Medline](#)
63. Y. Polyhach, E. Bordignon, R. Tschaggelar, S. Gandra, A. Godt, G. Jeschke, High sensitivity and versatility of the DEER experiment on nitroxide radical pairs at Q-band frequencies. *Phys. Chem. Chem. Phys.* **14**, 10762–10773 (2012). [doi:10.1039/c2cp41520h](https://doi.org/10.1039/c2cp41520h) [Medline](#)
64. G. Jeschke, V. Chechik, P. Ionita, A. Godt, H. Zimmermann, J. Banham, C. R. Timmel, D. Hilger, H. Jung, DeerAnalysis2006—A comprehensive software package for analyzing pulsed ELDOR data. *Appl. Magn. Reson.* **30**, 473–498 (2006). [doi:10.1007/BF03166213](https://doi.org/10.1007/BF03166213)
65. W. Humphrey, A. Dalke, K. Schulten, VMD: Visual molecular dynamics. *J. Mol. Graph.* **14**, 33–38, 27–28 (1996). [doi:10.1016/0263-7855\(96\)00018-5](https://doi.org/10.1016/0263-7855(96)00018-5) [Medline](#)
66. J. C. Phillips, R. Braun, W. Wang, J. Gumbart, E. Tajkhorshid, E. Villa, C. Chipot, R. D. Skeel, L. Kalé, K. Schulten, Scalable molecular dynamics with NAMD. *J. Comput. Chem.* **26**, 1781–1802 (2005). [doi:10.1002/jcc.20289](https://doi.org/10.1002/jcc.20289) [Medline](#)
67. J. Huang, S. Rauscher, G. Nawrocki, T. Ran, M. Feig, B. L. de Groot, H. Grubmüller, A. D. MacKerell Jr., CHARMM36m: An improved force field for folded and intrinsically disordered proteins. *Nat. Methods* **14**, 71–73 (2017). [doi:10.1038/nmeth.4067](https://doi.org/10.1038/nmeth.4067) [Medline](#)
68. T. Darden, D. York, L. Pedersen, Particle mesh Ewald: An N·log(N) method for Ewald sums in large systems. *J. Chem. Phys.* **98**, 10089–10092 (1998). [doi:10.1063/1.464397](https://doi.org/10.1063/1.464397)
69. S. E. Feller, Y. Zhang, R. W. Pastor, B. R. Brooks, Constant pressure molecular dynamics simulation: The Langevin piston method. *J. Chem. Phys.* **103**, 4613–4621 (1998). [doi:10.1063/1.470648](https://doi.org/10.1063/1.470648)
70. G. J. Martyna, Remarks on “Constant-temperature molecular dynamics with momentum conservation”. *Phys. Rev. E Stat. Phys. Plasmas Fluids Relat. Interdiscip. Topics* **50**, 3234–3236 (1994). [doi:10.1103/PhysRevE.50.3234](https://doi.org/10.1103/PhysRevE.50.3234) [Medline](#)
71. J.-P. Ryckaert, G. Ciccotti, H. J. C. Berendsen, Numerical integration of the cartesian equations of motion of a system with constraints: Molecular dynamics of n-alkanes. *J. Comput. Phys.* **23**, 327–341 (1977). [doi:10.1016/0021-9991\(77\)90098-5](https://doi.org/10.1016/0021-9991(77)90098-5)
72. T. D. Goddard, C. C. Huang, E. C. Meng, E. F. Pettersen, G. S. Couch, J. H. Morris, T. E. Ferrin, UCSF ChimeraX: Meeting modern challenges in visualization and analysis. *Protein Sci.* **27**, 14–25 (2018). [doi:10.1002/pro.3235](https://doi.org/10.1002/pro.3235) [Medline](#)

73. X. Liu, X. Xu, D. Hilger, P. Aschauer, J. K. S. Tiemann, Y. Du, H. Liu, K. Hirata, X. Sun, R. Guixà-González, J. M. Mathiesen, P. W. Hildebrand, B. K. Kobilka, Structural insights into the process of GPCR-G protein complex Formation. *Cell* **177**, 1243–1251.e12 (2019). [doi:10.1016/j.cell.2019.04.021](https://doi.org/10.1016/j.cell.2019.04.021) [Medline](#)
